# Supplementary figures and images for: Asymmetric effects of activating and inactivating cortical interneurons
Source: eLife journal article supplement (doi:10.7554/elife.18383), 2016-10-10

Figure 5 - supplement 5

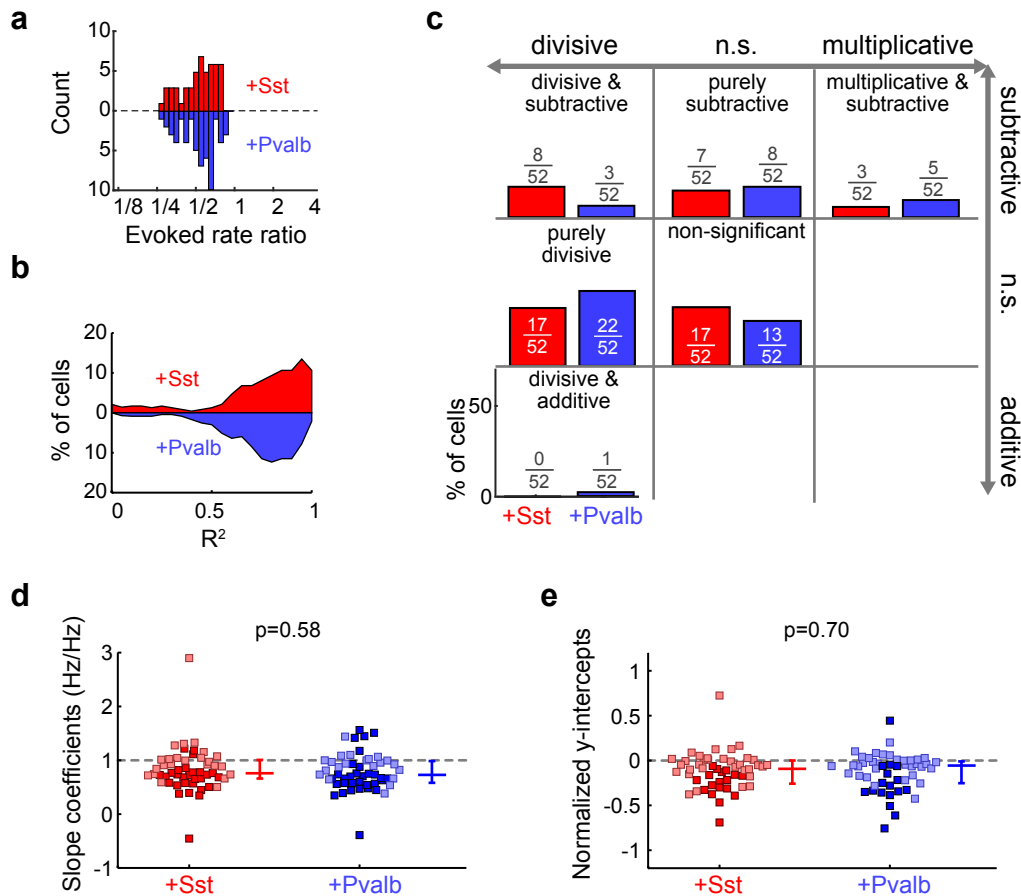

Supplement: supp [file elife-18383-supp-v1.zip]

Figure 3 - supplement 4

**a**

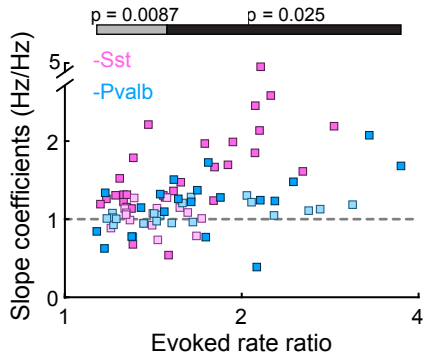

**b**

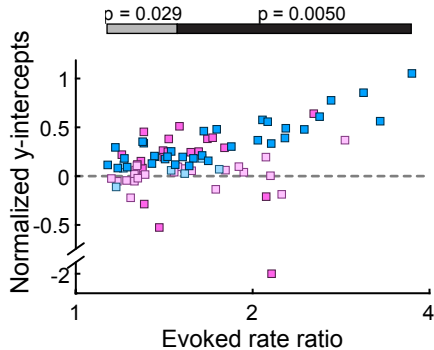

Supplement: supp [file elife-18383-supp-v1.zip]

Figure 5 - supplement 6

Putative Sst+ interneurons

Putative Pvalb+ interneurons

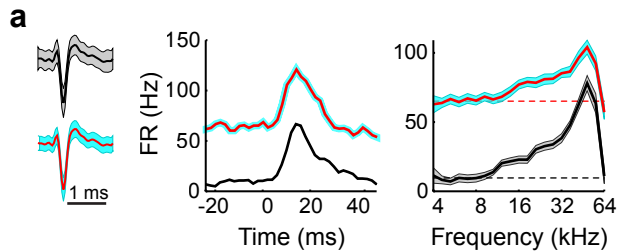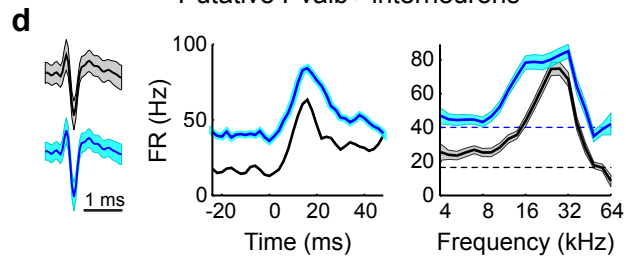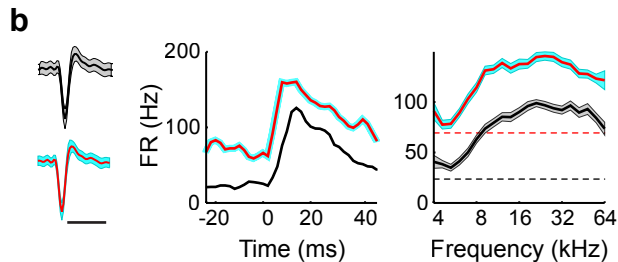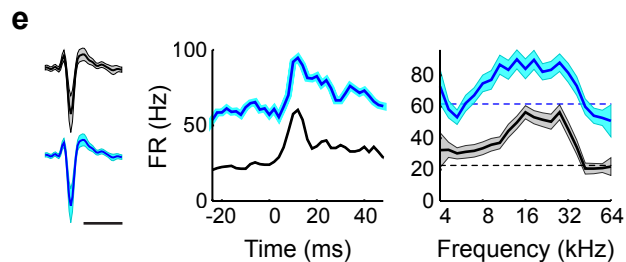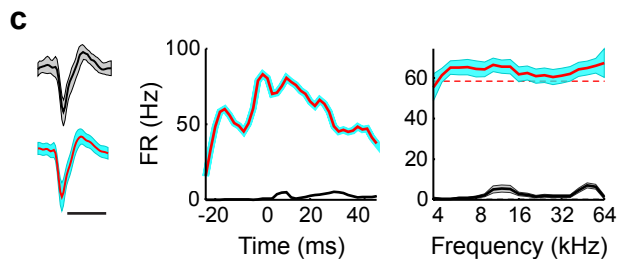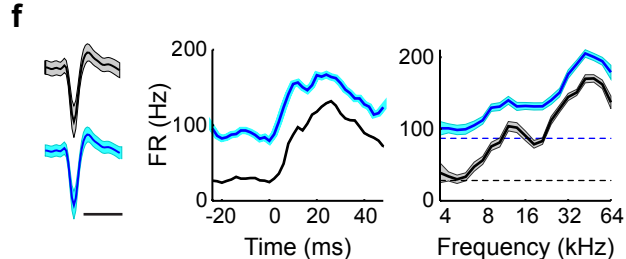

Supplement: supp [file elife-18383-supp-v1.zip]

Figure 4 - supplement 1

**a**

ChR2(GFP)

Sst

Merged

ChR2/Sst

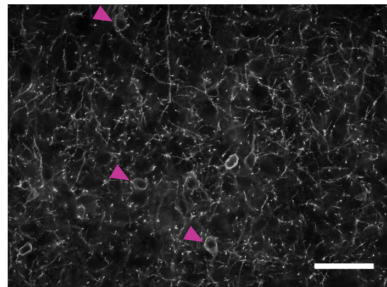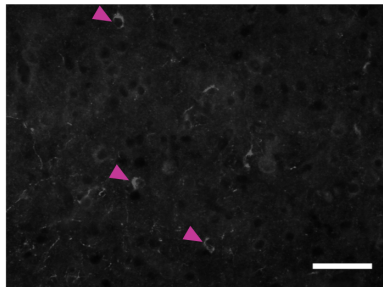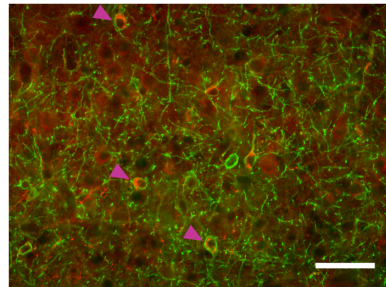

**b**

ChR2(GFP)

Pvalb

Merged

ChR2/Pvalb

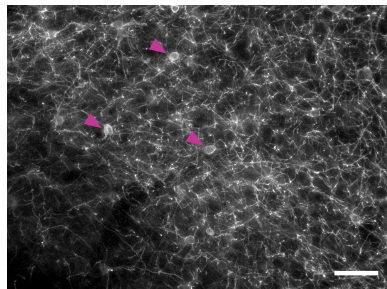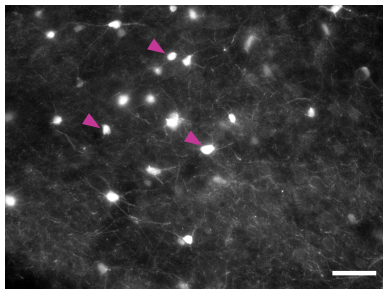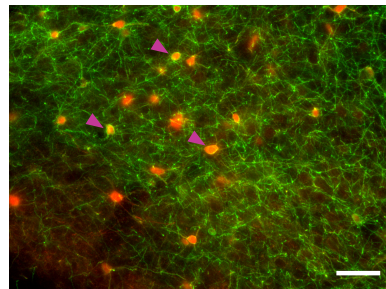

Supplement: supp [file elife-18383-supp-v1.zip]

Figure 3 - supplement 3

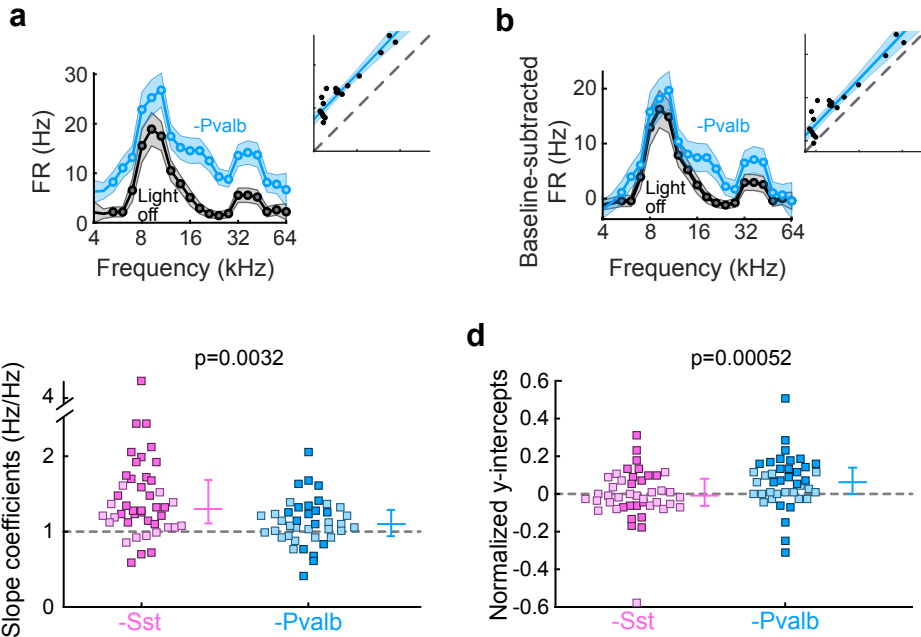

Supplement: supp [file elife-18383-supp-v1.zip]

Figure 5 - supplement 3

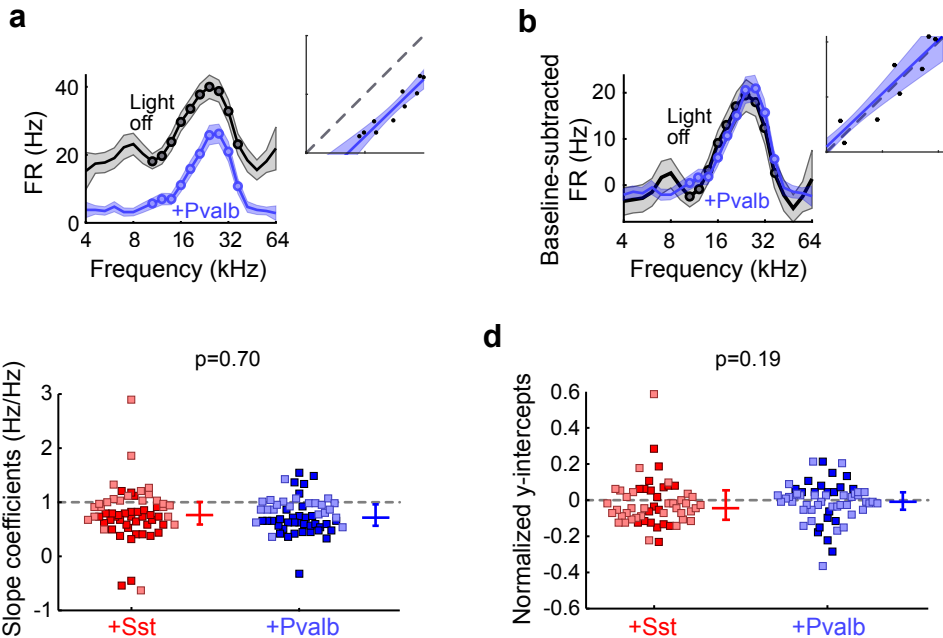

Supplement: supp [file elife-18383-supp-v1.zip]

Figure 5 - supplement 4

**a**

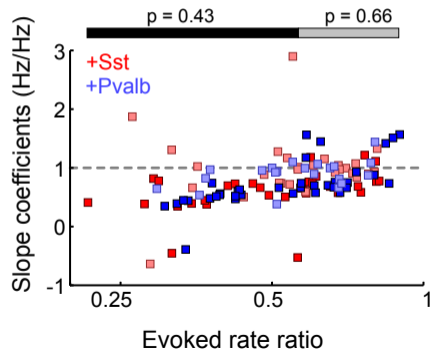

**b**

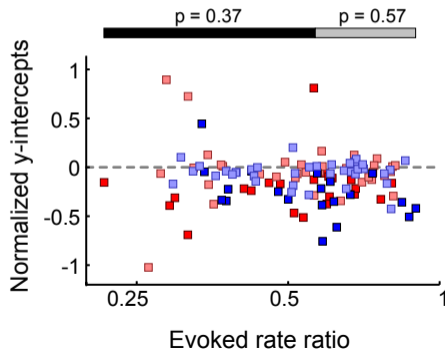

Supplement: supp [file elife-18383-supp-v1.zip]

Figure 4 - supplement 2

**a**

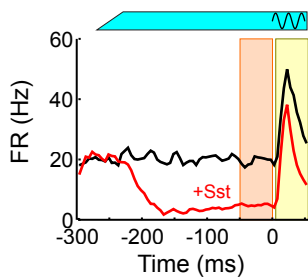

**b**

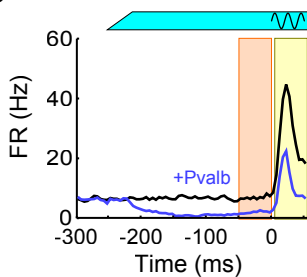

**c**

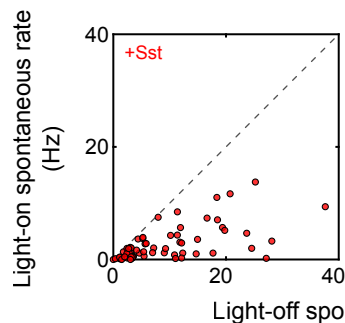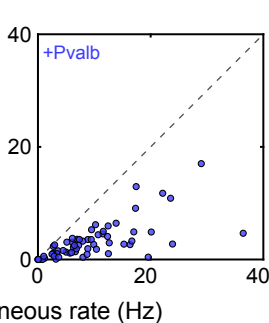

**d**

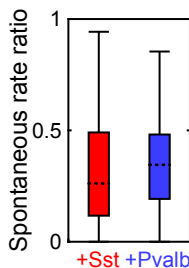

**c**

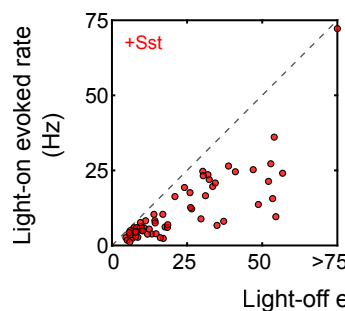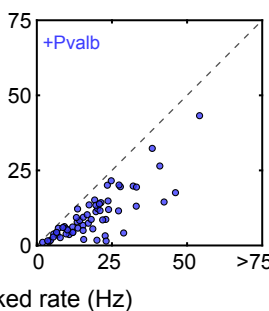

**d**

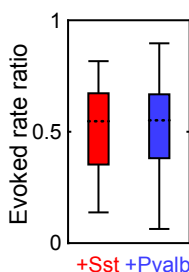

**e**

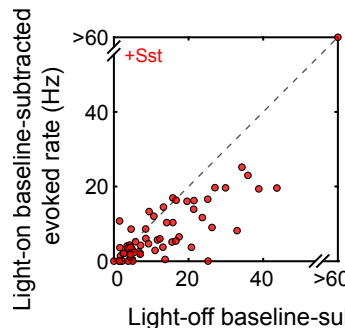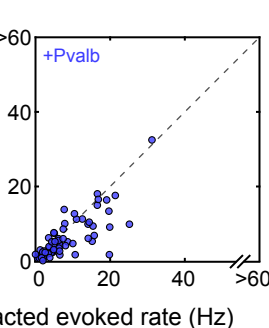

**f**

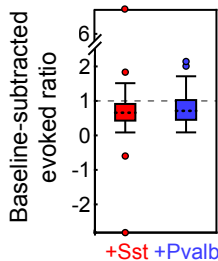

**g**

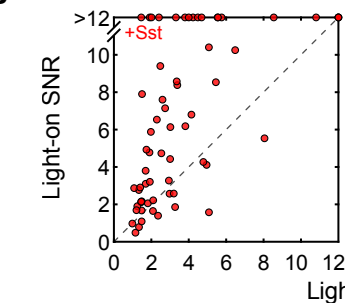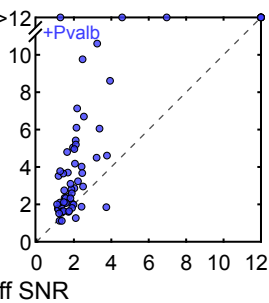

**h**

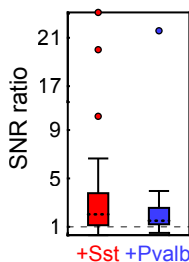

Supplement: supp [file elife-18383-supp-v1.zip]

Figure 3 - supplement 5

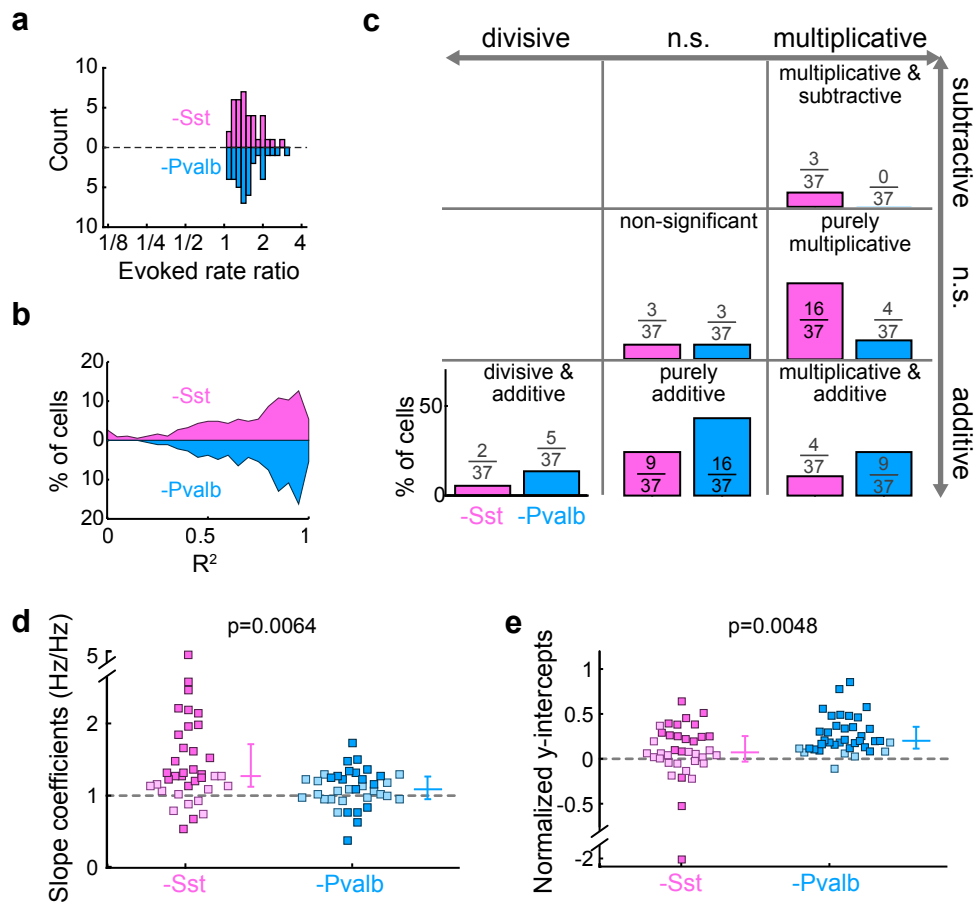

Supplement: supp [file elife-18383-supp-v1.zip]

Figure 1 - supplement 1

**a**

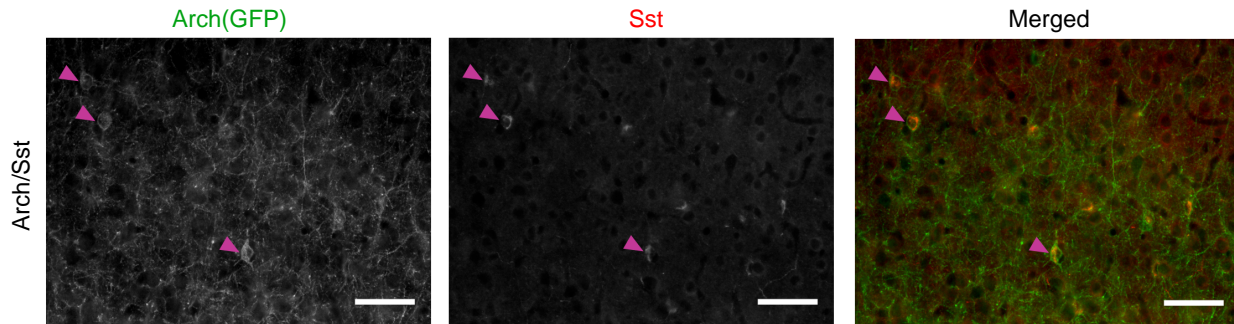

**b**

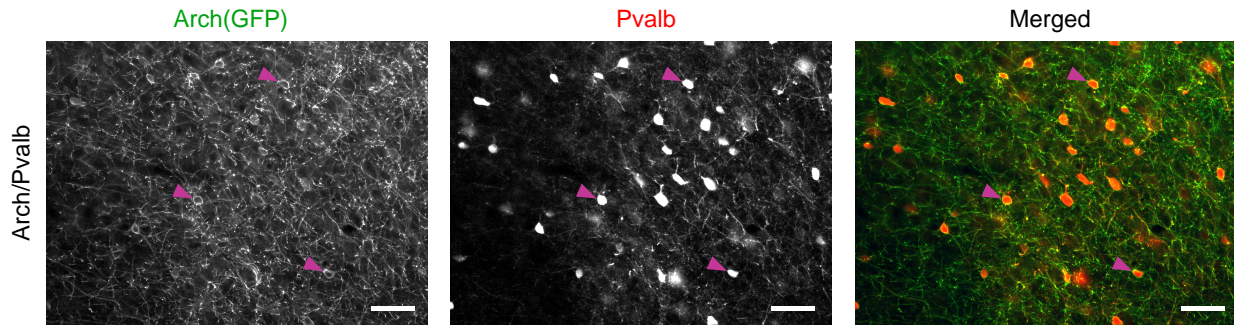

Supplement: supp [file elife-18383-supp-v1.zip]

Figure 3 - supplement 2

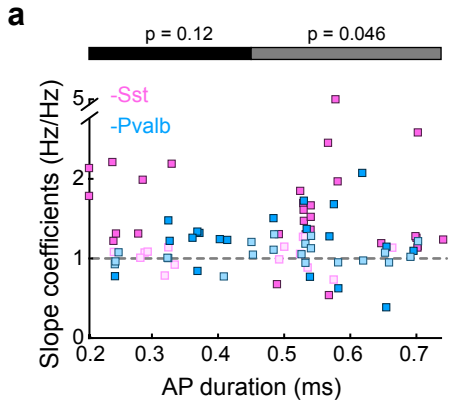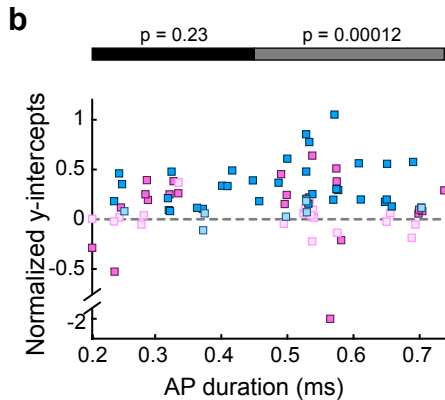

Supplement: supp [file elife-18383-supp-v1.zip]

Figure 5 - supplement 1

**a**

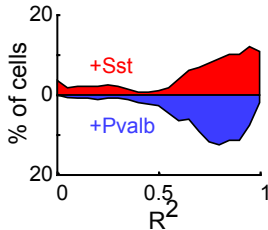

Supplement: supp [file elife-18383-supp-v1.zip]

Figure 1 – supplement 2

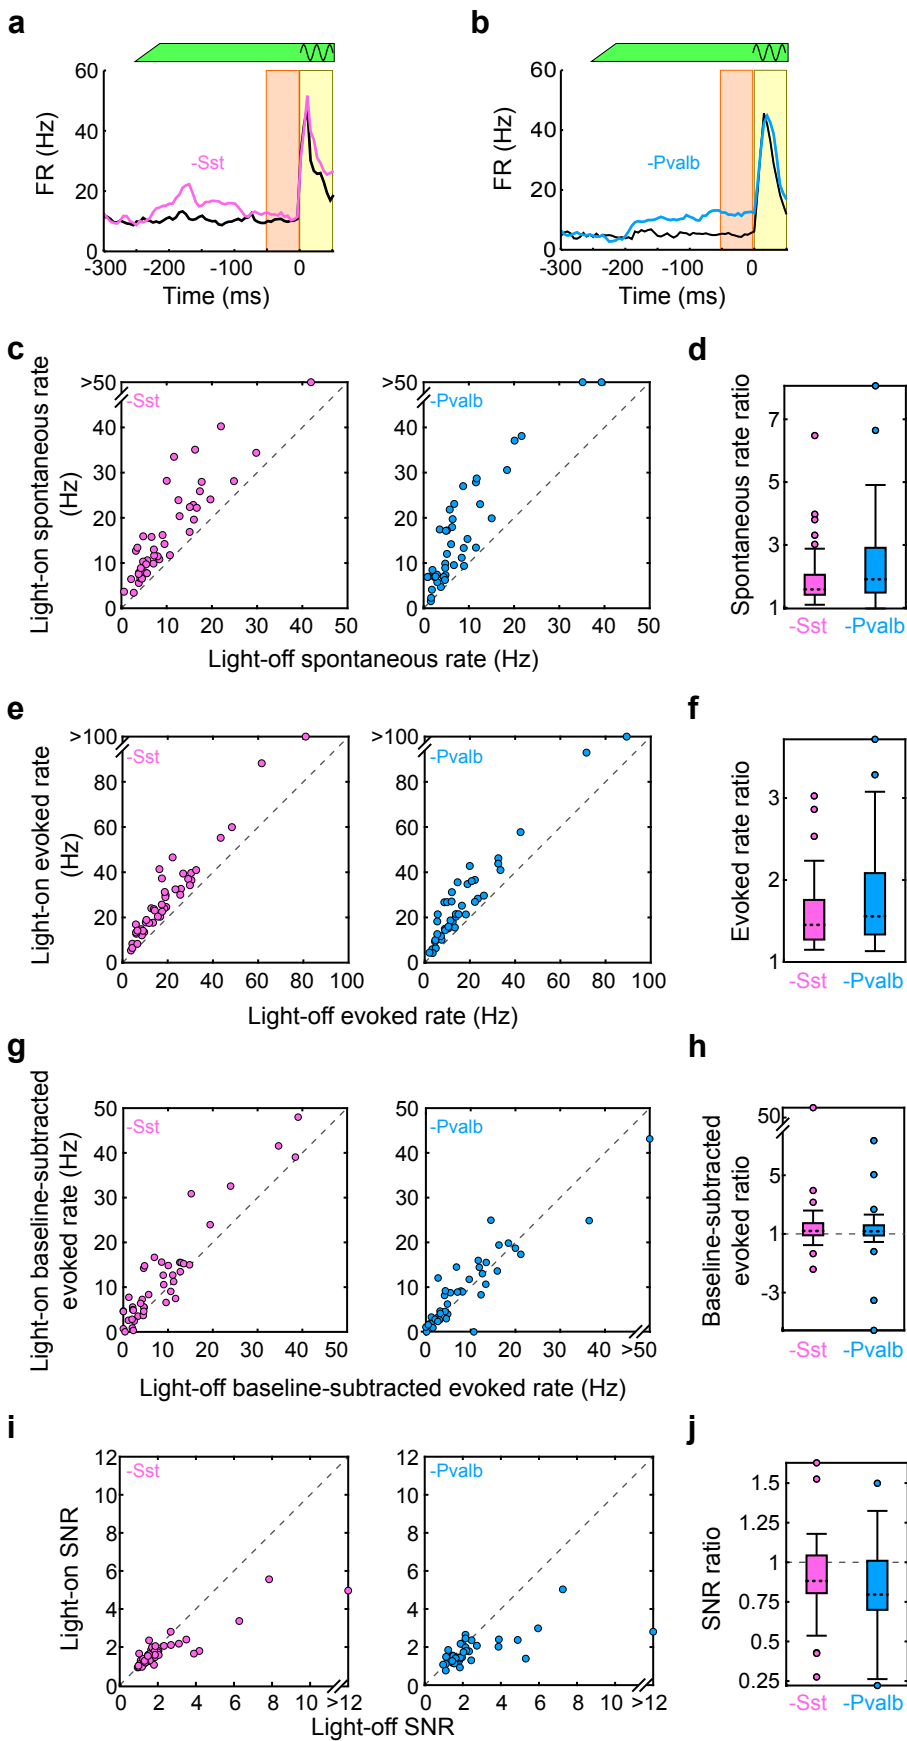

Supplement: supp [file elife-18383-supp-v1.zip]

Figure 5 - supplement 2

**a**

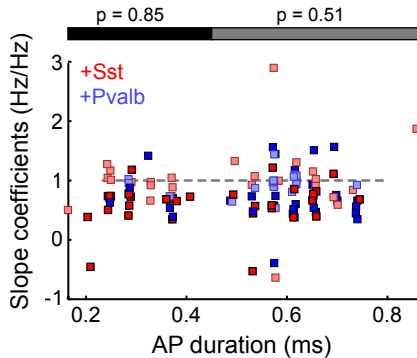

**b**

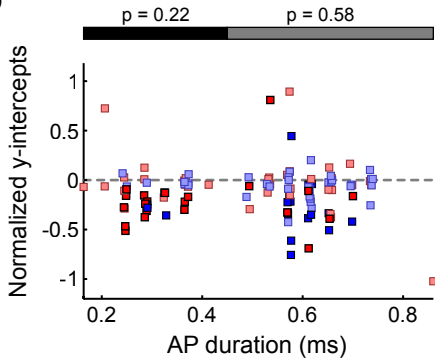

Supplement: supp [file elife-18383-supp-v1.zip]

Figure 3 - supplement 1

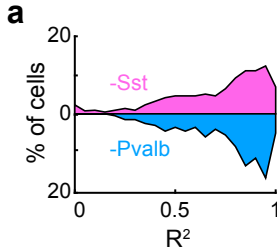

Supplement: supp [file elife-18383-supp-v1.zip]
